# Supplementary material
Source: Elsevier journal article supplement (https://www.sciencedirect.com/science/article/pii/S260364792100052X)
Supplement: mmc1 [file S260364792100052X:mmc1.doc]

**Anexo. Valoración de la pandemia por coronavirus y su impacto** **en la población.** **El punto de vista de las asociaciones de pacientes.**

*Dada la situación actual que estamos viviendo a nivel mundial por la infección por coronavirus, desde el Área de Participación y Capacitación de Pacientes del Hospital Sant Joan de Déu de Barcelona, nos gustaría conocer el punto de vista de las asociaciones de pacientes sobre la misma y el impacto que está produciendo en nuestros pacientes y familias.*

*Por esta razón, le agradeceríamos que respondiera una sencilla encuesta. La información que aporte será tratada con la máxima confidencialidad y se utilizará solamente para el propósito de este estudio de opinión.*

Para empezar, ¿nos podría decir el **número** aproximado de miembros que tiene la asociación que representa? ...............

Se trata de una asociación de **ámbito**:

- Local (una ciudad)
- Comunidad Autónoma
- Nacional
- Internacional

A continuación, haremos unas preguntas sobre el **impacto** actual de la pandemia.

En su opinión, ¿cómo cree que la pandemia por coronavirus ha afectado a los **pacientes y familias** que representa? (Ponga una cruz en la casilla que considere).

A los pacientes …

| **PACIENTES** | Ha afectado mucho | Ha afectado algo | Ha afectado poco | Prácticamente no ha afectado |
| --- | --- | --- | --- | --- |
| A nivel físico |  |  |  |  |
| A nivel psicológico |  |  |  |  |
| A nivel social |  |  |  |  |

Si cree que ha afectado a los pacientes de alguna forma, ¿en qué sentido lo dice? ¿Puede poner algún ejemplo?

A las familias …

| **FAMILIAS** | Ha afectado mucho | Ha afectado algo | Ha afectado poco | Prácticamente no ha afectado |
| --- | --- | --- | --- | --- |
| A nivel físico |  |  |  |  |
| A nivel psicológico |  |  |  |  |
| A nivel social |  |  |  |  |

Si cree que ha afectado a las familias de alguna forma, ¿en qué sentido lo dice? ¿Puede poner algún ejemplo?

¿Considera que se ha visto afectada la **patología de base** de los pacientes a los que representa?

- Si ¿De qué forma? _________________________________________________

____________________________________________________________________

- No.

¿Y cree que se ha visto afectada la **atención sanitaria** a los pacientes que representa?

- Si ¿De qué forma? _________________________________________________

____________________________________________________________________

- No.

Como asociación de pacientes o familiares, ¿qué **limitaciones o inconvenientes** han encontrado durante este tiempo de cuarentena?

¿Y cuáles han sido sus principales **retos**?

Ahora que se empieza a hablar de la "desescalada" o "la nueva normalidad" y de volver a recuperar poco a poco esa **normalidad** de cara a los próximos meses, ¿cómo cree que lo están viviendo las personas que representa?

|  | Mucho | Algo | Poco | Nada |
| --- | --- | --- | --- | --- |
| Les da miedo |  |  |  |  |
| Les preocupa |  |  |  |  |
| Sienten incertidumbre |  |  |  |  |
| Tienen esperanza |  |  |  |  |
| Lo viven de manera positiva |  |  |  |  |
| Están animados |  |  |  |  |

¿Puede explicar por qué motivos ha dado esas respuestas?

Para finalizar, si nos centramos ahora en cómo cree que evolucionará esta situación en **el futuro** ...

En su opinión, ¿cómo cree que **cambiará la sociedad** después de esta pandemia?

De cara al futuro, ¿cómo imagina el **papel de las asociaciones** de pacientes?

¿Cuáles serán sus **puntos fuertes**? ¿Por qué?

¿Qué **necesidades** cree que tendrán? ¿Por qué?

¿Qué nuevos **retos** se plantearán?

¿Desea añadir algún comentario?

Muchas gracias por su colaboración.

*Equipo FEP*
